# Supplementary material for: Multilevel regresion between supply chain 4.0 and environmental performance in large Brazilian companies
Source: Research Square preprint supplement (doi:10.21203/rs.3.rs-8585345/v1), 2026-01-29
Supplement: Supplementary file 1 [file 3b5695e6e4677dcd46a80574.docx]

**TableB Dataset**

Table B below shows company data for seven (7) sustainable indicators, collected through sustainability reports published on company websites.

**Table B** Environmental and Social Data of Sample Companies.

| **Company** | **Year** | **Water Consume (Megaliter)** | **CO2equiv Emissions (tCO2e) (Scopes  1, 2 e 3)** | **Energy Consume  (GJ)** | **Solid Waste Disposal  (Ton)** | **Training (Hour)** | **Job Accidents (Qty)** | **Generation and Maintenance of Jobs (Qty)** |
| --- | --- | --- | --- | --- | --- | --- | --- | --- |
| Aché | 2018 | 172 |  | 155887 | 2811 | 138606 | 12 | 4687 |
| 2019 | 163 |  | 173361 | 3023 | 426614 | 15 | 4975 |
| 2020 | 189 |  | 153945 | 3311 | 565000 | 27 | 5119 |
| 2021 | 133 | 4975 | 214535 | 2923 | 396114 | 13 | 5114 |
| Hypera | 2018 |  | 41945 | 457250 | 668 |  |  |  |
| 2019 |  | 53689 | 456028 | 1006 |  |  |  |
| 2020 | 223 | 44803 | 523444 | 810 | 135981 | 126 | 8970 |
| 2021 | 302 | 50203 | 254468 | 965 | 9509 | 53 | 9399 |
| Whirlpool | 2018 | 5473 | 753572 | 8060536 | 14712 |  |  | 29041 |
| 2019 | 5018 | 684411 | 7851315 | 13794 |  | 506 |  |
| 2020 | 4249 | 663172 | 7144184 | 11138 |  | 518 |  |
| 2021 | 3931 | 610717 | 7467571 | 11841 |  | 480 | 26611 |
| Multilaser | 2018 |  |  |  |  |  |  |  |
| 2019 |  |  |  |  |  |  |  |
| 2020 |  |  |  |  |  |  |  |
| 2021 |  |  |  |  |  |  |  |
| Braskem | 2018 | 75716 | 11016840 | 204392106 |  |  | 29 | 6173 |
| 2019 | 72389 | 10552493 | 188064527 |  |  | 17 | 6050 |
| 2020 | 69341 | 10786478 | 186882892 | 25178 |  | 17 | 6088 |
| 2021 | 70746 | 10868165 | 188512343 | 26780 |  | 12 | 6278 |
| Oxíteno | 2018 |  | 578433 | 7871509 | 6870 | 44800 | 9 | 1871 |
| 2019 | 3130 | 562133 | 8043089 | 10670 | 58000 | 10 |  |
| 2020 | 3361 | 567511 | 8231013 | 12288 | 54000 | 10 |  |
| 2021 | 3184 | 586663 | 8311231 | 15979 | 63000 | 20 | 1278 |
| Ourofino | 2018 | 132 | 5333 | 115787 | 1021 |  | 11 | 1059 |
| 2019 | 116 | 6318 | 116583 | 1318 | 36031 | 8 | 1066 |
| 2020 | 101 | 6495 | 119223 | 1145 | 13619 | 12 | 1024 |
| 2021 | 83 | 7949 | 124714 | 758 | 31806 | 7 | 1059 |
| Natura Cosméticos | 2018 | 138,6 | 333183 | 315799 | 647 | 2895479 | 17 | 4958 |
| 2019 | 119,7 | 325840 | 330966 | 709 | 3592006 | 20 | 5085 |
| 2020 | 118,1 | 347570 | 323431 | 793 | 7800000 | 10 | 5109 |
| 2021 | 160,6 | 360974 | 374587 | 1295 | 7700000 | 16 | 9240 |
| WEG | 2018 | 1063 | 135428 | 1675116 | 58602 | 2806954 | 239 | 22102 |
| 2019 | 1001 | 130704 | 1680253 | 63291 | 2891700 | 176 | 22950 |
| 2020 | 879 | 119886 | 1666714 | 46821 | 2416698 | 175 | 23928 |
| 2021 | 988 | 151275 | 1999206 | 63241 |  | 197 |  |
| Kepler Weber | 2018 | 46 |  | 51407 | 152 | 40963 | 31 | 1130 |
| 2019 | 45 |  | 54662 | 4260 | 54618 | 60 | 1146 |
| 2020 | 26 |  | 55787 | 4613 | 63361 | 26 | 1495 |
| 2021 | 24 | 8027 | 71223 | 6578 | 85712 | 52 | 1680 |
| Embraer | 2018 | 923 | 63734 | 886993 | 25729 |  | 716 | 18520 |
| 2019 | 898 | 65636 | 880513 | 23685 |  | 527 | 15901 |
| 2020 | 802 | 76501 | 1146694 | 17198 | 222614 | 284 | 15901 |
| 2021 | 874 | 87674 | 1183342 | 15868 | 546312 | 155 | 15658 |
| Marcopolo | 2018 |  |  |  |  | 305000 |  | 7262 |
| 2019 |  |  |  |  | 250000 |  | 9615 |
| 2020 |  |  |  |  |  |  |  |
| 2021 |  |  |  |  |  |  |  |
| Randon | 2018 | 130,20 |  | 1720951 | 45583 | 142510 | 302 | 9637 |
| 2019 | 158,5 | 37493 | 1860334 | 30363 | 176450 | 230 | 10170 |
| 2020 | 218,5 | 46345 | 2410364 | 25414 | 244780 | 174 | 12239 |
| 2021 | 213,1 | 74383 | 1779067 | 23697 | 293227 | 415 | 15433 |
| Iochpe-Maxion | 2018 | 2851 |  |  |  |  | 0 |  |
| 2019 | 2823 | 451184 | 5291406 | 34149 | 432689 | 82 | 16208 |
| 2020 | 2597 | 373536 | 4912707 |  |  | 73 | 16718 |
| 2021 |  | 387792 | 5803146 |  |  | 67 | 16724 |
| São Martinho | 2018 | 17229 | 7643714 | 56617836 | 1645 | 379631 | 10 | 12312 |
| 2019 | 15731 | 7103581 | 51291897 | 1580 | 353192 | 45 | 12176 |
| 2020 | 16647 | 7699625 | 55485675 | 1532 | 409502 | 39 | 12881 |
| 2021 | 15074 | 7300820 | 52048523 | 1758 | 210999 | 39 | 12733 |
| Raízen Energia | 2018 | 61123 | 1894040 | 155448082 |  | 727739 | 62 | 29119 |
| 2019 | 50999 | 40763309 | 155395216 | 5957 | 1077856 | 82 | 28843 |
| 2020 | 51200 | 47021907 | 159734540 | 4611 | 15020 | 72 | 28941 |
| 2021 | 63850 | 51708495 | 113975349 | 8592 | 1293824 | 126 | 41131 |
| Tigre | 2018 | 150 | 13385 | 4653563 |  | 99057 | 68 | 4272 |
| 2019 | 203 | 13450 | 8155965 | 873 | 56309 | 48 | 3749 |
| 2020 | 220 |  | 8729287 | 756 |  | 22 | 3849 |
| 2021 |  |  |  |  |  |  |  |
| Gerdau | 2018 | 23972 |  |  | 1526017 |  | 514 | 17005 |
| 2019 | 26832 | 13839065 | 151201599 | 1558544 |  | 338 | 17276 |
| 2020 | 20911 | 13019165 | 145365489 | 942345 |  | 334 | 17122 |
| 2021 | 19568 | 16433733 | 152011412 | 1164641 |  | 365 | 21695 |
| JBS | 2018 | 181 | 6652049 | 67804702 | 432673 |  | 4261 | 121260 |
| 2019 | 172 | 6323566 | 70806354 | 579533 |  | 7813 | 128414 |
| 2020 | 171 | 67301256 | 71399186 | 438657 | 559035 | 7237 | 141887 |
| 2021 | 177 | 71107884 | 73633645 | 477108 | 432503 | 6457 | 143213 |
| BRF | 2018 |  | 3238338 | 27.763.513 | 106946 | 1432099 | 4324 | 85244 |
| 2019 | 55256 | 3405046 | 31013564 | 129863 | 1.976.044 | 4403 | 86137 |
| 2020 | 9468 | 3241666 | 30879245 | 152689 | 2371000 | 1847 | 93666 |
| 2021 | 8641 | 3452582 | 32038851 | 117060 | 2697429 | 1287 | 92949 |
| Ambev | 2018 | 38632 | 2945102 | 11558131 | 7445 | 708063 | 145 | 29513 |
| 2019 | 47790 | 3030805 | 10005208 | 3175 | 275380 | 96 | 29296 |
| 2020 | 17287 | 2910141 | 9534639 | 1875 | 1276712 | 90 | 36653 |
| 2021 | 15838 | 3173658 | 10913818 | 1498 | 27355 | 141 | 30835 |
| Guararapes | 2018 |  |  |  |  | 2900000 |  | 35708 |
| 2019 |  | 57353 | 266901 |  | 3100000 |  | 38303 |
| 2020 | 1058 | 42620 | 202415 |  | 4800000 | 367 | 35510 |
| 2021 | 1354 | 67305 | 235983 | 4858 | 3900000 | 414 | 35325 |
| Alpargatas Calçados | 2018 |  |  |  |  | 5000 |  |  |
| 2019 |  |  |  |  | 22000 |  |  |
| 2020 | 204 | 80651 | 672238 | 10481 | 22000 | 55 | 16758 |
| 2021 | 194 | 94360 | 731037 | 14208 | 32072 | 105 | 15410 |
| Suzano S/A | 2018 |  | 4120209 | 215802157 | 521498 | 845165 | 405 | 14609 |
| 2019 | 2356 | 3724998 | 242697258 | 769960 | 735759 | 195 | 13643 |
| 2020 | 1807 | 3783528 | 240264031 | 814205 | 542674 | 146 | 14699 |
| 2021 | 1641 | 4308252 | 249561594 | 762022 | 522122 | 120 | 16433 |
| Klabin | 2018 | 18736 | 6125387 | 59193778 | 68035 | 718695 | 406 | 14791 |
| 2019 | 17290 | 6979118 | 63735723 | 73197 | 786056 | 333 | 14608 |
| 2020 | 16220 | 6615420 | 69135673 | 40833 |  | 302 | 14874 |
| 2021 | 19391 | 7225140 | 70626289 | 49545 | 113000 | 279 | 17517 |
| Casa da Moeda | 2018 | 225 | 7490 | 44 | 523 |  |  | 2151 |
| 2019 | 208 | 6662 | 45 | 391 |  |  | 1983 |
| 2020 |  | 5953 |  | 533 |  |  | 1963 |
| 2021 |  |  |  | 468 |  |  | 1934 |
| Dexco | 2018 | 4376 | 333035 | 10904985 | 19322 | 204484 | 47 | 10595 |
| 2019 | 2291 | 351209 | 7111395 | 30440 | 300869 | 42 | 9897 |
| 2020 | 2832 | 407508 | 9689362 | 39361 | 178612 | 39 | 12758 |
| 2021 | 3577 | 538624 | 11024262 | 71880 | 191520 | 37 | 13583 |
| Ipiranga | 2018 | 119 | 362649 | 134300 |  | 133412 | 5 | 3286 |
| 2019 | 121 | 593670 | 116814 |  | 98012 | 11 | 3289 |
| 2020 | 114 | 623637 | 92909 | 2449 | 56700 | 13 | 3355 |
| 2021 | 114 | 602785 | 107797 | 2795 | 93857 | 17 | 4011 |
| VIBRA | 2018 | 365 | 96588306 | 5457029 | 67270 | 180000 | 31 | 47556 |
| 2019 | 383 | 94786173 | 5248013 |  | 91000 | 24 | 4480 |
| 2020 | 337 | 88230999 | 5188769 | 4979 | 50862 | 23 | 3370 |
| 2021 | 331 | 94070639 | 5905348 | 3019 | 712400 | 19 | 3377 |
| Magazine Luiza | 2018 |  | 26303 | 284674 |  | 286894 |  | 27454 |
| 2019 |  | 48326 |  | 445 | 53303 |  | 41518 |
| 2020 |  | 100087 | 240000 | 1349 | 702775 |  | 38614 |
| 2021 | 398 | 278490 | 3685330 | 4181 | 1066695 |  | 50795 |
| Carrefour BR | 2018 | 3420 |  | 3332585 |  | 236314 | 1068 |  |
| 2019 | 3626 | 289010 | 3663292 | 31300 | 271981 | 1101 | 88.745 |
| 2020 | 3524 | 267752 | 3647002 | 34900 | 220246 | 850 | 95667 |
| 2021 |  | 391586 | 5909641 | 77942 |  | 659 | 100.482 |
| Lojas Renner | 2018 | 537 | 39059 | 653100 | 70 | 2590744 | 70 | 22334 |
| 2019 | 310 | 42601 | 659300 | 597 | 2488686 | 79 | 24162 |
| 2020 | 115 | 35061 | 495000 | 247 | 2450943 | 48 | 24757 |
| 2021 | 129 | 51418 | 661700 | 222 | 1696530 | 46 | 25705 |
| Comgás | 2018 | 8658 | 20326 | 53729 |  |  | 10 | 1005 |
| 2019 | 12676 | 9006055 | 54548 | 429 | 40854 | 11 | 1225 |
| 2020 | 8474 | 8442813 | 56324 | 253 | 16292 | 22 | 1195 |
| 2021 | 8583 | 9676262 | 51965 | 150 | 6374 | 9 | 1171 |
| Sabesp | 2018 | 2806 | 2223172 | 8940000 |  | 433470 | 126 | 14449 |
| 2019 | 2880 | 2326272 | 9123000 |  | 404405 | 126 | 13945 |
| 2020 | 2933 | 2574565 | 9680000 |  | 499434 | 94 | 12806 |
| 2021 | 2899 |  | 10219000 |  | 450540 | 114 | 12515 |
| Eletrobras | 2018 | 941 | 6063440 | 87091967 | 21964 | 763900 | 90 | 15658 |
| 2019 | 638 | 5897384 | 85337298 | 15001 | 547510 | 68 | 14369 |
| 2020 | 563 | 6046210 | 91318781 | 18657 | 596290 | 68 | 13803 |
| 2021 | 18091 | 8288650 | 130919692 | 5670 | 724039 | 104 | 13433 |
| Adecoagro | 2018 | 7341 | 446839 | 25020422 | 1104 | 316600 | 111 | 5795 |
| 2019 | 7696 | 487976 | 29782478 | 1027 | 408337 | 129 | 6321 |
| 2020 | 6900 | 346491 | 26152063 | 486 | 380708 | 80 | 6621 |
| 2021 | 7216 | 632513 | 26056962 | 659 | 392943 | 70 | 6593 |
| FRISIA | 2018 |  |  |  |  | 1642 | 17 | 1042 |
| 2019 |  |  |  |  | 1634 | 13 | 1147 |
| 2020 |  |  |  |  | 1316 | 8 | 1119 |
| 2021 |  |  |  |  | 2090 | 7 | 1171 |
| SLC Agrícola | 2018 | 52193 | 572900 |  | 2274 | 224704 | 25 | 3511 |
| 2019 | 37096 | 577256 | 1462400 | 2500 | 272976 | 38 | 3630 |
| 2020 | 21972 | 749874 | 1533900 | 3454 | 132093 | 27 | 3742 |
| 2021 | 22339 |  | 1642400 | 2300 | 218036 | 23 | 4161 |
| Vale | 2018 | 1158000 | 599100000 | 195000000 | 304600 | 2706270 | 155 | 55230 |
| 2019 | 811000 | 574500000 | 164000000 | 309300 | 2771950 | 299 | 55439 |
| 2020 | 699000 | 490500000 | 143000000 | 281500 | 2970699 | 140 | 58249 |
| 2021 | 608000 | 506000000 | 146000000 | 208300 | 3469221 | 121 | 55067 |
| Siderurgica Nacional | 2018 | 16084 | 15044355 | 128630905 | 137008 | 393066 | 208 | 23699 |
| 2019 | 15028 | 11179904 | 103981653 | 180706 | 520494 | 230 | 24869 |
| 2020 | 14925 | 11300549 | 100500217 | 197451 | 205120 | 182 | 23577 |
| 2021 | 23301 | 13769805 | 112333349 | 189115 | 353492 | 194 | 25147 |
| Petrobras | 2018 | 266327 | 412000412 | 888559000 | 67270 | 7651256 | 396 | 145075 |
| 2019 | 239080 | 59000400 | 837568000 | 85230 | 8002918 | 299 | 145640 |
| 2020 | 220194 | 56000410 | 821161000 | 52480 | 6229539 | 201 | 132911 |
| 2021 | 219842 | 62000436 | 932450000 | 50700 | 9036999 | 191 | 131104 |
| MRV | 2018 | 2003 | 275.098 | 1420000 | 298500 | 31900 | 340 | 22494 |
| 2019 | 2092 | 292.028 | 1550000 | 253000 | 10000 | 278 | 18516 |
| 2020 | 2863 | 223.576 | 1250000 | 278600 | 572 | 250 | 19058 |
| 2021 | 2927 | 258534 | 1190000 | 214699 | 22167 | 912 | 22285 |
| Votorantim Cimentos | 2018 | 4727 | 24414293 | 104932975 | 46150 | 226708 | 50 | 11932 |
| 2019 | 9907 | 21706588 | 95362025 | 39890 | 191248 | 55 | 11953 |
| 2020 | 9573 | 22773738 | 101167919 | 105098 | 212094 | 45 | 11783 |
| 2021 | 11746 | 32591809 | 126191306 | 34588 | 236854 | 55 | 12466 |
| Transpetro | 2018 |  |  |  |  | 297046 | 11 | 6464 |
| 2019 |  |  |  |  | 252136 | 10 | 6475 |
| 2020 |  |  |  |  | 146130 | 6 | 6053 |
| 2021 |  |  |  |  | 157625 | 4 | 5539 |
| MRS Logística | 2018 |  | 656729 | 9798497 | 178 | 126609 | 19 | 6029 |
| 2019 | 126 | 462493 | 7765187 | 888 | 214576 | 20 | 5803 |
| 2020 | 125 | 485934 | 7358997 | 933 | 224420 | 16 | 5851 |
| 2021 | 121 | 659696 | 7972172 | 925 | 279357 | 15 | 6148 |
| JSL | 2018 | 349 | 419651 | 4590250 | 50 | 93827 | 60 | 13178 |
| 2019 | 384 | 432417 | 8179900 | 2746 | 100852 | 78 | 13429 |
| 2020 | 393 | 406730 | 8046087 | 1136 | 42314 | 62 | 13433 |
| 2021 | 565 | 516176 | 12421640 | 757 | 575977 | 55 | 25497 |
