# Supplementary material for: Multilevel regresion between supply chain 4.0 and environmental performance in large Brazilian companies
Source: Research Square preprint supplement (doi:10.21203/rs.3.rs-8585345/v1), 2026-01-29
Supplement: Supplementary file 2 [file 65e67e254deeba0daa970dd2.docx]

**TableA Dataset**

Table A below indicates the data collected on the time of use (in years) of digital technologies in Supply Chain (SC), by the companies in the sample.

**Table A** Digital Technology Usage Time Indicators, from 2018 to 2021, and the Respective Companies. T1 is DigAutomSensor, T2 is Cloud,Fog&Edge, T3 is BigDataAnalytics, T4 is AugmVirtualReality, T5 is MobileApp, T6 is HMI, T7 is IoT, T8 is AdditiveManuf, T9 is HorizVerticalIntegration, T10 is MES/SCADA, T11 is Cobot, T12 is CyberSecurity, T13 is SmartSensor, T14 is Simulation, T15 is ManagSmartSystem, T16 is AGV and T17 is Drone.

| **Company** | **Year** | **Digital Technology Use Indicator** | | | | | | | | | | | | | | | | |
| --- | --- | --- | --- | --- | --- | --- | --- | --- | --- | --- | --- | --- | --- | --- | --- | --- | --- | --- |
| **T1** | **T2** | **T3** | **T4** | **T5** | **T6** | **T7** | **T8** | **T9** | **T10** | **T11** | **T12** | **T13** | **T14** | **T15** | **T16** | **T17** |
| Aché | 2018 | 0 | 0 | 0 | 0 | 0 | 1 | 0 | 0 | 0 | 0 | 0 | 0 | 0 | 0 | 0 | 0 | 0 |
| 2019 | 1 | 0 | 0 | 0 | 1 | 2 | 0 | 0 | 0 | 0 | 0 | 0 | 0 | 0 | 0 | 0 | 0 |
| 2020 | 2 | 1 | 1 | 0 | 2 | 3 | 0 | 0 | 1 | 0 | 0 | 0 | 0 | 0 | 1 | 1 | 0 |
| 2021 | 3 | 2 | 2 | 0 | 3 | 4 | 0 | 0 | 2 | 1 | 0 | 0 | 0 | 0 | 2 | 2 | 0 |
| Hypera | 2018 | 1 | 1 | 1 | 1 | 0 | 0 | 1 | 0 | 1 | 0 | 0 | 0 | 0 | 0 | 1 | 0 | 0 |
| 2019 | 2 | 2 | 2 | 2 | 0 | 0 | 2 | 0 | 2 | 0 | 0 | 0 | 0 | 0 | 2 | 0 | 0 |
| 2020 | 3 | 3 | 3 | 3 | 0 | 0 | 3 | 1 | 3 | 0 | 1 | 0 | 0 | 0 | 3 | 0 | 0 |
| 2021 | 4 | 4 | 4 | 4 | 0 | 1 | 4 | 2 | 4 | 0 | 2 | 1 | 1 | 0 | 4 | 0 | 0 |
| Whirlpool | 2018 | 1 | 0 | 1 | 0 | 1 | 0 | 1 | 0 | 0 | 0 | 1 | 0 | 1 | 0 | 1 | 1 | 0 |
| 2019 | 2 | 0 | 2 | 0 | 2 | 0 | 2 | 0 | 0 | 0 | 2 | 0 | 2 | 0 | 2 | 2 | 0 |
| 2020 | 3 | 0 | 3 | 0 | 3 | 0 | 3 | 0 | 0 | 0 | 3 | 0 | 3 | 0 | 3 | 3 | 0 |
| 2021 | 4 | 0 | 4 | 0 | 4 | 0 | 4 | 0 | 0 | 0 | 4 | 0 | 4 | 0 | 4 | 4 | 0 |
| Multilaser | 2018 | 0 | 0 | 0 | 0 | 1 | 1 | 1 | 0 | 0 | 0 | 0 | 0 | 0 | 0 | 1 | 0 | 0 |
| 2019 | 0 | 0 | 0 | 0 | 2 | 2 | 2 | 0 | 0 | 0 | 0 | 0 | 0 | 0 | 2 | 0 | 0 |
| 2020 | 0 | 0 | 0 | 0 | 3 | 3 | 3 | 0 | 0 | 0 | 0 | 0 | 0 | 0 | 3 | 0 | 0 |
| 2021 | 0 | 1 | 1 | 0 | 4 | 4 | 4 | 0 | 0 | 0 | 0 | 0 | 0 | 0 | 4 | 0 | 0 |
| Braskem | 2018 | 1 | 0 | 1 | 1 | 0 | 0 | 0 | 0 | 1 | 0 | 0 | 1 | 1 | 0 | 1 | 0 | 1 |
| 2019 | 2 | 0 | 2 | 2 | 0 | 0 | 1 | 1 | 2 | 0 | 0 | 2 | 2 | 1 | 2 | 0 | 2 |
| 2020 | 3 | 0 | 3 | 3 | 0 | 0 | 2 | 2 | 3 | 0 | 0 | 3 | 3 | 2 | 3 | 0 | 3 |
| 2021 | 4 | 0 | 4 | 4 | 0 | 0 | 3 | 3 | 4 | 0 | 0 | 4 | 4 | 3 | 4 | 0 | 4 |
| Oxíteno | 2018 | 1 | 0 | 0 | 0 | 0 | 0 | 0 | 0 | 0 | 0 | 0 | 0 | 0 | 0 | 0 | 0 | 0 |
| 2019 | 2 | 0 | 0 | 0 | 0 | 0 | 0 | 0 | 0 | 0 | 0 | 0 | 0 | 0 | 0 | 0 | 0 |
| 2020 | 3 | 1 | 1 | 0 | 0 | 0 | 0 | 0 | 1 | 0 | 0 | 0 | 0 | 0 | 0 | 0 | 0 |
| 2021 | 4 | 2 | 2 | 0 | 1 | 0 | 0 | 0 | 2 | 0 | 0 | 0 | 0 | 0 | 0 | 0 | 0 |
| Ourofino | 2018 | 1 | 1 | 1 | 0 | 0 | 0 | 0 | 0 | 1 | 0 | 0 | 1 | 0 | 0 | 0 | 0 | 0 |
| 2019 | 2 | 2 | 2 | 0 | 1 | 0 | 1 | 0 | 2 | 0 | 0 | 2 | 0 | 0 | 0 | 0 | 0 |
| 2020 | 3 | 3 | 3 | 0 | 2 | 0 | 2 | 0 | 3 | 0 | 0 | 3 | 0 | 0 | 0 | 0 | 0 |
| 2021 | 4 | 4 | 4 | 0 | 3 | 0 | 3 | 0 | 4 | 0 | 0 | 4 | 0 | 0 | 0 | 0 | 0 |
| Natura Cosméticos | 2018 | 0 | 0 | 0 | 0 | 0 | 0 | 0 | 0 | 0 | 0 | 0 | 0 | 0 | 0 | 0 | 0 | 0 |
| 2019 | 1 | 0 | 1 | 1 | 1 | 0 | 0 | 1 | 1 | 0 | 0 | 1 | 0 | 1 | 0 | 1 | 0 |
| 2020 | 2 | 0 | 2 | 2 | 2 | 0 | 0 | 2 | 2 | 0 | 0 | 2 | 0 | 2 | 0 | 2 | 0 |
| 2021 | 3 | 1 | 3 | 3 | 3 | 0 | 0 | 3 | 3 | 0 | 0 | 3 | 0 | 3 | 0 | 3 | 0 |
| Weg | 2018 | 0 | 0 | 0 | 1 | 0 | 0 | 1 | 0 | 0 | 0 | 0 | 1 | 0 | 0 | 1 | 0 | 0 |
| 2019 | 1 | 0 | 0 | 2 | 1 | 0 | 2 | 0 | 1 | 1 | 0 | 2 | 1 | 1 | 2 | 0 | 0 |
| 2020 | 2 | 0 | 1 | 3 | 2 | 0 | 3 | 0 | 2 | 2 | 0 | 3 | 2 | 2 | 3 | 0 | 0 |
| 2021 | 3 | 1 | 2 | 4 | 3 | 1 | 4 | 0 | 3 | 3 | 0 | 4 | 3 | 3 | 4 | 0 | 0 |
| Kepler Weber | 2018 | 1 | 0 | 0 | 0 | 0 | 0 | 0 | 0 | 0 | 0 | 0 | 0 | 1 | 0 | 0 | 0 | 0 |
| 2019 | 2 | 1 | 1 | 0 | 1 | 0 | 1 | 0 | 1 | 0 | 0 | 0 | 2 | 0 | 0 | 0 | 0 |
| 2020 | 3 | 2 | 2 | 0 | 2 | 0 | 2 | 0 | 2 | 0 | 0 | 0 | 3 | 0 | 0 | 0 | 0 |
| 2021 | 4 | 3 | 3 | 0 | 3 | 0 | 3 | 0 | 3 | 0 | 0 | 0 | 4 | 0 | 0 | 0 | 0 |
| Embraer | 2018 | 1 | 0 | 1 | 1 | 1 | 0 | 1 | 0 | 1 | 1 | 0 | 1 | 1 | 1 | 1 | 1 | 0 |
| 2019 | 2 | 0 | 2 | 2 | 2 | 0 | 2 | 0 | 2 | 2 | 0 | 2 | 2 | 2 | 2 | 2 | 0 |
| 2020 | 3 | 0 | 3 | 3 | 3 | 0 | 3 | 0 | 3 | 3 | 0 | 3 | 3 | 3 | 3 | 3 | 0 |
| 2021 | 4 | 1 | 4 | 4 | 4 | 0 | 4 | 1 | 4 | 4 | 0 | 4 | 4 | 4 | 4 | 4 | 0 |
| Marcopolo | 2018 | 0 | 0 | 0 | 0 | 0 | 0 | 0 | 0 | 0 | 0 | 0 | 0 | 1 | 0 | 0 | 0 | 0 |
| 2019 | 1 | 0 | 0 | 0 | 1 | 1 | 0 | 0 | 0 | 0 | 0 | 0 | 2 | 1 | 0 | 0 | 0 |
| 2020 | 2 | 0 | 0 | 0 | 2 | 2 | 0 | 0 | 0 | 0 | 0 | 0 | 3 | 2 | 1 | 0 | 0 |
| 2021 | 3 | 1 | 1 | 1 | 3 | 3 | 1 | 0 | 1 | 0 | 0 | 0 | 4 | 3 | 2 | 0 | 0 |
| Randon | 2018 | 0 | 0 | 0 | 0 | 0 | 0 | 0 | 0 | 0 | 0 | 0 | 0 | 0 | 0 | 1 | 0 | 0 |
| 2019 | 0 | 0 | 1 | 1 | 0 | 0 | 0 | 1 | 1 | 0 | 0 | 1 | 1 | 0 | 2 | 0 | 0 |
| 2020 | 1 | 1 | 2 | 2 | 1 | 0 | 1 | 2 | 2 | 0 | 0 | 2 | 2 | 1 | 3 | 0 | 0 |
| 2021 | 2 | 2 | 3 | 3 | 2 | 0 | 2 | 3 | 3 | 0 | 0 | 3 | 3 | 2 | 4 | 1 | 0 |
| Iochpe-Maxion | 2018 | 0 | 0 | 0 | 0 | 0 | 0 | 0 | 0 | 0 | 0 | 0 | 0 | 0 | 0 | 0 | 0 | 0 |
| 2019 | 1 | 0 | 1 | 1 | 1 | 0 | 1 | 1 | 0 | 0 | 0 | 0 | 1 | 1 | 1 | 0 | 0 |
| 2020 | 2 | 0 | 2 | 2 | 2 | 0 | 2 | 2 | 1 | 1 | 0 | 0 | 2 | 2 | 2 | 0 | 0 |
| 2021 | 3 | 1 | 3 | 3 | 3 | 1 | 3 | 3 | 2 | 2 | 0 | 0 | 3 | 3 | 3 | 0 | 0 |
| São Martinho | 2018 | 0 | 0 | 1 | 0 | 1 | 0 | 1 | 0 | 1 | 0 | 0 | 1 | 1 | 0 | 0 | 1 | 1 |
| 2019 | 0 | 0 | 2 | 0 | 2 | 0 | 2 | 0 | 2 | 0 | 0 | 2 | 2 | 0 | 1 | 2 | 2 |
| 2020 | 0 | 0 | 3 | 0 | 3 | 0 | 3 | 0 | 3 | 0 | 0 | 3 | 3 | 0 | 2 | 3 | 3 |
| 2021 | 0 | 0 | 4 | 0 | 4 | 0 | 4 | 0 | 4 | 0 | 0 | 4 | 4 | 0 | 3 | 4 | 4 |
| Raízen Energia | 2018 | 1 | 1 | 1 | 0 | 0 | 0 | 1 | 0 | 1 | 0 | 0 | 0 | 1 | 1 | 1 | 0 | 1 |
| 2019 | 2 | 2 | 2 | 1 | 1 | 0 | 2 | 0 | 2 | 0 | 0 | 0 | 2 | 2 | 2 | 0 | 2 |
| 2020 | 3 | 3 | 3 | 2 | 2 | 0 | 3 | 0 | 3 | 0 | 0 | 0 | 3 | 3 | 3 | 0 | 3 |
| 2021 | 4 | 4 | 4 | 3 | 3 | 0 | 4 | 0 | 4 | 0 | 0 | 0 | 4 | 4 | 4 | 1 | 4 |
| Tigre | 2018 | 0 | 1 | 1 | 0 | 0 | 0 | 0 | 1 | 1 | 0 | 0 | 0 | 0 | 1 | 1 | 0 | 0 |
| 2019 | 1 | 2 | 2 | 0 | 0 | 0 | 0 | 2 | 2 | 0 | 0 | 0 | 0 | 2 | 2 | 0 | 0 |
| 2020 | 2 | 3 | 3 | 0 | 0 | 0 | 0 | 3 | 3 | 0 | 0 | 1 | 1 | 3 | 3 | 0 | 0 |
| 2021 | 3 | 4 | 4 | 0 | 0 | 0 | 0 | 4 | 4 | 0 | 0 | 2 | 2 | 4 | 4 | 0 | 0 |
| Gerdau | 2018 | 1 | 0 | 1 | 0 | 1 | 0 | 0 | 0 | 0 | 0 | 0 | 0 | 1 | 0 | 0 | 0 | 1 |
| 2019 | 2 | 0 | 2 | 0 | 2 | 0 | 0 | 0 | 0 | 0 | 0 | 0 | 2 | 0 | 0 | 0 | 2 |
| 2020 | 3 | 0 | 3 | 0 | 3 | 0 | 0 | 1 | 1 | 0 | 0 | 0 | 3 | 0 | 0 | 0 | 3 |
| 2021 | 4 | 0 | 4 | 0 | 4 | 0 | 0 | 2 | 2 | 1 | 0 | 1 | 4 | 0 | 0 | 0 | 4 |
| JBS | 2018 | 0 | 0 | 0 | 0 | 0 | 0 | 0 | 0 | 1 | 0 | 0 | 0 | 0 | 0 | 0 | 0 | 0 |
| 2019 | 0 | 0 | 0 | 0 | 1 | 0 | 0 | 0 | 2 | 0 | 0 | 0 | 0 | 0 | 0 | 0 | 0 |
| 2020 | 0 | 0 | 1 | 0 | 2 | 0 | 1 | 0 | 3 | 0 | 0 | 0 | 1 | 0 | 1 | 0 | 0 |
| 2021 | 1 | 1 | 2 | 0 | 3 | 0 | 2 | 0 | 4 | 0 | 0 | 0 | 2 | 0 | 2 | 0 | 0 |
| BRF | 2018 | 1 | 0 | 1 | 0 | 1 | 0 | 1 | 0 | 1 | 0 | 0 | 1 | 1 | 0 | 1 | 0 | 0 |
| 2019 | 2 | 1 | 2 | 0 | 2 | 0 | 2 | 0 | 2 | 0 | 0 | 2 | 2 | 0 | 2 | 0 | 0 |
| 2020 | 3 | 2 | 3 | 0 | 3 | 0 | 3 | 0 | 3 | 1 | 0 | 3 | 3 | 0 | 3 | 0 | 0 |
| 2021 | 4 | 3 | 4 | 0 | 4 | 0 | 4 | 0 | 4 | 2 | 0 | 4 | 4 | 0 | 4 | 0 | 1 |
| Ambev | 2018 | 1 | 0 | 1 | 1 | 1 | 0 | 1 | 0 | 1 | 0 | 0 | 1 | 1 | 0 | 1 | 0 | 0 |
| 2019 | 2 | 0 | 2 | 2 | 2 | 0 | 2 | 0 | 2 | 0 | 0 | 2 | 2 | 0 | 2 | 0 | 0 |
| 2020 | 3 | 0 | 3 | 3 | 3 | 0 | 3 | 0 | 3 | 0 | 0 | 3 | 3 | 0 | 3 | 0 | 0 |
| 2021 | 4 | 1 | 4 | 4 | 4 | 0 | 4 | 0 | 4 | 1 | 0 | 4 | 4 | 0 | 4 | 0 | 0 |
| Guararapes | 2018 | 0 | 0 | 1 | 0 | 1 | 0 | 0 | 0 | 0 | 0 | 0 | 0 | 0 | 0 | 0 | 0 | 0 |
| 2019 | 1 | 0 | 2 | 0 | 2 | 0 | 0 | 0 | 0 | 0 | 0 | 1 | 1 | 0 | 1 | 0 | 0 |
| 2020 | 2 | 1 | 3 | 0 | 3 | 0 | 0 | 0 | 1 | 0 | 0 | 2 | 2 | 0 | 2 | 0 | 0 |
| 2021 | 3 | 2 | 4 | 0 | 4 | 0 | 0 | 0 | 2 | 0 | 0 | 3 | 3 | 0 | 3 | 0 | 0 |
| Alpargatas Calçados | 2018 | 0 | 0 | 0 | 0 | 0 | 0 | 0 | 1 | 0 | 0 | 0 | 0 | 0 | 0 | 0 | 0 | 0 |
| 2019 | 0 | 0 | 1 | 0 | 0 | 0 | 0 | 2 | 0 | 0 | 0 | 0 | 0 | 0 | 1 | 0 | 0 |
| 2020 | 0 | 0 | 2 | 0 | 0 | 0 | 0 | 3 | 0 | 0 | 0 | 0 | 0 | 0 | 2 | 0 | 0 |
| 2021 | 0 | 0 | 3 | 0 | 0 | 0 | 0 | 4 | 1 | 0 | 0 | 0 | 1 | 0 | 3 | 0 | 0 |
| Suzano S/A | 2018 | 1 | 0 | 1 | 1 | 1 | 0 | 1 | 0 | 1 | 0 | 0 | 1 | 1 | 1 | 1 | 0 | 0 |
| 2019 | 2 | 1 | 2 | 2 | 1 | 1 | 2 | 0 | 2 | 0 | 0 | 2 | 2 | 2 | 2 | 0 | 0 |
| 2020 | 3 | 2 | 3 | 3 | 2 | 2 | 3 | 0 | 3 | 0 | 0 | 3 | 3 | 3 | 3 | 0 | 1 |
| 2021 | 4 | 3 | 4 | 4 | 3 | 3 | 4 | 0 | 4 | 0 | 0 | 4 | 4 | 4 | 4 | 0 | 2 |
| Klabin | 2018 | 0 | 0 | 0 | 0 | 0 | 0 | 0 | 0 | 0 | 0 | 0 | 0 | 0 | 0 | 0 | 0 | 1 |
| 2019 | 0 | 1 | 1 | 0 | 1 | 0 | 0 | 0 | 1 | 0 | 0 | 1 | 1 | 0 | 1 | 0 | 2 |
| 2020 | 0 | 2 | 2 | 1 | 2 | 0 | 0 | 0 | 2 | 0 | 0 | 2 | 2 | 1 | 1 | 0 | 3 |
| 2021 | 1 | 3 | 3 | 2 | 3 | 0 | 0 | 0 | 3 | 0 | 0 | 3 | 3 | 2 | 2 | 0 | 4 |
| Casa da Moeda | 2018 | 1 | 1 | 1 | 0 | 1 | 1 | 0 | 0 | 1 | 0 | 1 | 1 | 1 | 1 | 1 | 0 | 0 |
| 2019 | 2 | 2 | 2 | 0 | 2 | 2 | 0 | 0 | 2 | 0 | 2 | 2 | 2 | 2 | 2 | 0 | 0 |
| 2020 | 3 | 3 | 3 | 0 | 3 | 3 | 0 | 0 | 3 | 0 | 3 | 3 | 3 | 3 | 3 | 0 | 0 |
| 2021 | 4 | 4 | 4 | 0 | 4 | 4 | 0 | 0 | 4 | 0 | 4 | 4 | 4 | 4 | 4 | 0 | 0 |
| Dexco | 2018 | 0 | 1 | 1 | 0 | 1 | 1 | 1 | 1 | 1 | 0 | 0 | 0 | 0 | 0 | 1 | 0 | 0 |
| 2019 | 0 | 2 | 2 | 0 | 2 | 2 | 2 | 2 | 2 | 0 | 0 | 0 | 0 | 0 | 2 | 0 | 0 |
| 2020 | 1 | 3 | 3 | 0 | 3 | 3 | 3 | 3 | 3 | 0 | 0 | 0 | 1 | 0 | 3 | 0 | 0 |
| 2021 | 2 | 4 | 4 | 0 | 4 | 4 | 4 | 4 | 4 | 0 | 0 | 0 | 2 | 0 | 4 | 0 | 0 |
| Ipiranga | 2018 | 0 | 1 | 1 | 0 | 1 | 0 | 0 | 0 | 1 | 0 | 0 | 1 | 0 | 0 | 0 | 0 | 0 |
| 2019 | 0 | 2 | 2 | 0 | 2 | 0 | 0 | 0 | 2 | 0 | 0 | 2 | 0 | 0 | 0 | 0 | 0 |
| 2020 | 0 | 3 | 3 | 0 | 3 | 0 | 0 | 0 | 3 | 0 | 0 | 3 | 0 | 0 | 0 | 0 | 0 |
| 2021 | 0 | 4 | 4 | 0 | 4 | 0 | 0 | 0 | 4 | 0 | 0 | 4 | 0 | 0 | 1 | 0 | 0 |
| Vibra | 2018 | 0 | 0 | 0 | 0 | 0 | 0 | 0 | 0 | 0 | 0 | 0 | 0 | 0 | 0 | 0 | 0 | 0 |
| 2019 | 0 | 1 | 1 | 1 | 1 | 0 | 1 | 0 | 1 | 0 | 0 | 0 | 0 | 0 | 1 | 0 | 1 |
| 2020 | 0 | 2 | 2 | 2 | 2 | 1 | 2 | 0 | 2 | 0 | 0 | 1 | 0 | 0 | 2 | 0 | 2 |
| 2021 | 0 | 3 | 3 | 3 | 3 | 2 | 3 | 0 | 3 | 0 | 0 | 2 | 0 | 0 | 3 | 0 | 3 |
| Magazine Luiza | 2018 | 0 | 1 | 1 | 0 | 1 | 1 | 0 | 0 | 1 | 0 | 0 | 1 | 1 | 0 | 1 | 0 | 0 |
| 2019 | 0 | 2 | 2 | 0 | 2 | 2 | 0 | 0 | 2 | 0 | 0 | 2 | 2 | 0 | 2 | 0 | 0 |
| 2020 | 0 | 3 | 3 | 0 | 3 | 3 | 0 | 0 | 3 | 0 | 0 | 3 | 3 | 0 | 3 | 0 | 0 |
| 2021 | 0 | 4 | 4 | 0 | 4 | 4 | 0 | 0 | 4 | 0 | 0 | 4 | 4 | 0 | 4 | 0 | 0 |
| Carrefour BR | 2018 | 0 | 0 | 1 | 0 | 0 | 0 | 0 | 0 | 1 | 0 | 0 | 0 | 0 | 0 | 0 | 0 | 0 |
| 2019 | 0 | 0 | 1 | 0 | 1 | 0 | 0 | 0 | 2 | 0 | 0 | 1 | 1 | 0 | 1 | 0 | 0 |
| 2020 | 0 | 0 | 2 | 0 | 2 | 0 | 0 | 0 | 3 | 0 | 0 | 2 | 2 | 0 | 2 | 0 | 0 |
| 2021 | 0 | 0 | 3 | 0 | 3 | 0 | 0 | 0 | 4 | 0 | 0 | 3 | 3 | 0 | 3 | 0 | 0 |
| Lojas Renner | 2018 | 0 | 1 | 0 | 0 | 1 | 0 | 1 | 0 | 1 | 0 | 0 | 1 | 1 | 0 | 1 | 1 | 0 |
| 2019 | 0 | 2 | 0 | 0 | 2 | 0 | 2 | 0 | 2 | 0 | 0 | 2 | 2 | 0 | 2 | 2 | 0 |
| 2020 | 0 | 3 | 1 | 0 | 3 | 0 | 3 | 0 | 3 | 0 | 0 | 3 | 3 | 0 | 3 | 3 | 0 |
| 2021 | 0 | 4 | 2 | 1 | 4 | 0 | 4 | 0 | 4 | 0 | 0 | 4 | 4 | 0 | 4 | 4 | 0 |
| Comgás | 2018 | 0 | 0 | 1 | 0 | 1 | 1 | 1 | 0 | 1 | 1 | 0 | 0 | 1 | 0 | 1 | 0 | 0 |
| 2019 | 0 | 0 | 2 | 0 | 2 | 2 | 2 | 0 | 2 | 2 | 0 | 0 | 2 | 0 | 2 | 0 | 0 |
| 2020 | 0 | 1 | 3 | 0 | 3 | 3 | 3 | 0 | 3 | 3 | 0 | 0 | 3 | 1 | 3 | 0 | 0 |
| 2021 | 0 | 2 | 4 | 0 | 4 | 4 | 4 | 0 | 4 | 4 | 0 | 0 | 4 | 2 | 4 | 0 | 0 |
| Sabesp | 2018 | 1 | 1 | 1 | 0 | 1 | 1 | 1 | 0 | 0 | 1 | 0 | 1 | 1 | 0 | 1 | 0 | 0 |
| 2019 | 2 | 2 | 2 | 0 | 2 | 2 | 2 | 0 | 1 | 2 | 0 | 2 | 2 | 0 | 2 | 0 | 0 |
| 2020 | 3 | 3 | 3 | 0 | 3 | 3 | 3 | 0 | 2 | 3 | 0 | 3 | 3 | 0 | 3 | 0 | 0 |
| 2021 | 4 | 4 | 4 | 1 | 4 | 4 | 4 | 0 | 3 | 4 | 0 | 4 | 4 | 1 | 4 | 0 | 0 |
| Eletrobras | 2018 | 0 | 0 | 1 | 0 | 0 | 0 | 1 | 0 | 1 | 0 | 0 | 1 | 1 | 0 | 0 | 0 | 0 |
| 2019 | 0 | 0 | 2 | 0 | 0 | 0 | 2 | 0 | 2 | 0 | 0 | 2 | 2 | 0 | 0 | 0 | 0 |
| 2020 | 0 | 0 | 3 | 0 | 1 | 0 | 3 | 0 | 3 | 1 | 0 | 3 | 3 | 1 | 1 | 0 | 0 |
| 2021 | 0 | 0 | 4 | 0 | 2 | 0 | 4 | 0 | 4 | 2 | 0 | 4 | 4 | 2 | 2 | 0 | 0 |
| Adecoagro | 2018 | 0 | 0 | 0 | 0 | 0 | 0 | 0 | 0 | 0 | 0 | 0 | 0 | 0 | 0 | 0 | 0 | 0 |
| 2019 | 1 | 0 | 0 | 0 | 1 | 1 | 1 | 0 | 1 | 0 | 0 | 0 | 1 | 0 | 1 | 0 | 0 |
| 2020 | 2 | 1 | 1 | 0 | 2 | 2 | 2 | 0 | 2 | 0 | 0 | 0 | 2 | 0 | 2 | 0 | 1 |
| 2021 | 3 | 2 | 2 | 0 | 3 | 3 | 3 | 0 | 3 | 0 | 0 | 0 | 3 | 0 | 3 | 0 | 2 |
| Frisia | 2018 | 0 | 0 | 0 | 0 | 0 | 0 | 0 | 0 | 0 | 0 | 0 | 0 | 0 | 0 | 0 | 0 | 0 |
| 2019 | 0 | 0 | 0 | 0 | 0 | 0 | 0 | 0 | 0 | 0 | 0 | 0 | 0 | 0 | 0 | 0 | 0 |
| 2020 | 0 | 1 | 1 | 0 | 1 | 0 | 1 | 0 | 1 | 0 | 0 | 0 | 1 | 0 | 1 | 0 | 0 |
| 2021 | 0 | 2 | 2 | 1 | 2 | 0 | 2 | 0 | 2 | 0 | 0 | 0 | 2 | 0 | 2 | 0 | 0 |
| SLC Agrícola | 2018 | 0 | 0 | 1 | 0 | 1 | 1 | 1 | 0 | 1 | 0 | 0 | 0 | 1 | 0 | 0 | 0 | 1 |
| 2019 | 0 | 1 | 2 | 0 | 2 | 2 | 2 | 0 | 2 | 0 | 0 | 0 | 2 | 0 | 2 | 0 | 2 |
| 2020 | 0 | 2 | 3 | 0 | 3 | 3 | 3 | 0 | 3 | 0 | 0 | 0 | 3 | 0 | 3 | 0 | 3 |
| 2021 | 0 | 3 | 4 | 0 | 4 | 4 | 4 | 0 | 4 | 0 | 0 | 1 | 4 | 0 | 4 | 0 | 4 |
| Vale | 2018 | 1 | 1 | 1 | 1 | 1 | 1 | 1 | 0 | 1 | 0 | 0 | 0 | 1 | 1 | 1 | 1 | 1 |
| 2019 | 2 | 2 | 2 | 2 | 2 | 2 | 2 | 0 | 2 | 0 | 0 | 0 | 2 | 2 | 2 | 2 | 2 |
| 2020 | 3 | 3 | 3 | 3 | 3 | 3 | 3 | 0 | 3 | 0 | 0 | 0 | 3 | 3 | 3 | 3 | 3 |
| 2021 | 4 | 4 | 4 | 4 | 4 | 4 | 4 | 0 | 4 | 0 | 0 | 0 | 4 | 4 | 4 | 4 | 4 |
| Siderúrgica Nacional | 2018 | 1 | 1 | 1 | 0 | 0 | 0 | 1 | 0 | 1 | 0 | 0 | 1 | 1 | 0 | 1 | 0 | 0 |
| 2019 | 2 | 2 | 2 | 0 | 0 | 0 | 2 | 0 | 2 | 0 | 0 | 2 | 2 | 0 | 2 | 0 | 0 |
| 2020 | 3 | 3 | 3 | 0 | 0 | 1 | 3 | 0 | 3 | 0 | 0 | 3 | 3 | 0 | 3 | 1 | 0 |
| 2021 | 4 | 4 | 4 | 1 | 0 | 2 | 4 | 0 | 4 | 1 | 0 | 4 | 4 | 1 | 4 | 2 | 0 |
| Petrobras | 2018 | 0 | 1 | 1 | 0 | 1 | 0 | 1 | 0 | 1 | 0 | 0 | 1 | 1 | 0 | 1 | 0 | 0 |
| 2019 | 1 | 2 | 2 | 1 | 2 | 1 | 2 | 0 | 2 | 0 | 0 | 2 | 2 | 1 | 2 | 0 | 0 |
| 2020 | 2 | 3 | 3 | 2 | 3 | 2 | 3 | 0 | 3 | 0 | 0 | 3 | 3 | 2 | 3 | 0 | 0 |
| 2021 | 3 | 4 | 4 | 3 | 4 | 3 | 4 | 0 | 4 | 0 | 0 | 4 | 4 | 3 | 4 | 0 | 1 |
| MRV | 2018 | 0 | 1 | 1 | 1 | 1 | 0 | 1 | 1 | 1 | 0 | 1 | 1 | 1 | 1 | 1 | 0 | 1 |
| 2019 | 0 | 2 | 2 | 2 | 2 | 0 | 2 | 2 | 2 | 0 | 2 | 2 | 2 | 2 | 2 | 0 | 2 |
| 2020 | 0 | 3 | 3 | 3 | 3 | 0 | 3 | 3 | 3 | 0 | 3 | 3 | 3 | 3 | 3 | 0 | 3 |
| 2021 | 0 | 4 | 4 | 4 | 4 | 0 | 4 | 4 | 4 | 0 | 4 | 4 | 4 | 4 | 4 | 0 | 4 |
| Votorantim Cimentos | 2018 | 1 | 1 | 1 | 1 | 1 | 1 | 1 | 0 | 1 | 1 | 0 | 0 | 1 | 0 | 0 | 1 | 0 |
| 2019 | 2 | 2 | 2 | 2 | 2 | 2 | 2 | 0 | 2 | 2 | 0 | 0 | 2 | 1 | 1 | 2 | 1 |
| 2020 | 3 | 3 | 3 | 3 | 3 | 3 | 3 | 0 | 3 | 3 | 0 | 0 | 3 | 2 | 2 | 3 | 2 |
| 2021 | 4 | 4 | 4 | 4 | 4 | 4 | 4 | 0 | 4 | 4 | 0 | 0 | 4 | 3 | 3 | 4 | 3 |
| Transpetro | 2018 | 1 | 1 | 1 | 0 | 1 | 0 | 1 | 0 | 1 | 1 | 0 | 0 | 1 | 1 | 1 | 1 | 1 |
| 2019 | 2 | 2 | 2 | 0 | 2 | 0 | 2 | 0 | 2 | 2 | 0 | 0 | 2 | 2 | 2 | 2 | 2 |
| 2020 | 3 | 3 | 3 | 1 | 3 | 0 | 3 | 0 | 3 | 3 | 0 | 0 | 3 | 3 | 3 | 3 | 3 |
| 2021 | 4 | 4 | 4 | 2 | 4 | 0 | 4 | 0 | 4 | 4 | 0 | 0 | 4 | 4 | 4 | 4 | 4 |
| MRS Logística | 2018 | 0 | 0 | 1 | 0 | 0 | 0 | 1 | 0 | 1 | 0 | 0 | 0 | 1 | 1 | 1 | 0 | 0 |
| 2019 | 0 | 0 | 2 | 0 | 0 | 0 | 2 | 0 | 2 | 0 | 0 | 1 | 2 | 2 | 2 | 0 | 0 |
| 2020 | 0 | 1 | 3 | 1 | 1 | 0 | 3 | 0 | 3 | 0 | 0 | 2 | 3 | 3 | 3 | 1 | 0 |
| 2021 | 0 | 2 | 4 | 2 | 2 | 0 | 4 | 0 | 4 | 0 | 0 | 3 | 4 | 4 | 4 | 2 | 1 |
| JSL | 2018 | 0 | 0 | 1 | 0 | 1 | 0 | 1 | 0 | 1 | 0 | 0 | 0 | 1 | 1 | 1 | 0 | 0 |
| 2019 | 0 | 0 | 2 | 0 | 2 | 0 | 2 | 0 | 2 | 0 | 0 | 0 | 2 | 2 | 2 | 0 | 0 |
| 2020 | 0 | 0 | 3 | 0 | 3 | 0 | 3 | 0 | 3 | 0 | 0 | 0 | 3 | 3 | 3 | 0 | 0 |
| 2021 | 0 | 0 | 4 | 0 | 4 | 0 | 4 | 0 | 4 | 0 | 0 | 0 | 4 | 4 | 4 | 0 | 0 |
